# Supplementary material for: Epigenetic regulation of ZEB1-RAB25/ESRP1 axis plays a critical role in phenylbutyrate treatment-resistant breast cancer
Source: PubMed Central journal article supplement (PMC4811494; doi:10.18632/oncotarget.6480), 2015-12-05
Supplement: oncotarget-07-1741-s001.pdf [file oncotarget-07-1741-s001.pdf]

## Epigenetic regulation of ZEB1-RAB25/ESRP1 axis plays a critical role in phenylbutyrate treatment-resistant breast cancer

### Supplementary Material

**TableS1. PCR sequence of primers and fluorescent probe**

| method           | Gene              | Forward primer(5`>3`)         | Fluorescent(5`>3`)                  | Reverse primer(5`>3`)         |
|------------------|-------------------|-------------------------------|-------------------------------------|-------------------------------|
| RT-PCR           | $\beta$<br>actin  | TCACCCACACTGTG<br>CCCATCTACGA |                                     | CAGCGGAACCGCT<br>CATTGCCAATGG |
| RT-PCR           | MUC<br>L1         | CTGGTACTCTTGGG<br>AGTTTC      |                                     | TTGGGTAAAAGTGG<br>AATGTCT     |
| RT-PCR           | RAB<br>25         | ATGTTTCGCTGAAAA<br>CAATGG     |                                     | GGGTGGACAGATAA<br>AAGAGG      |
| RT-PCR           | TFA<br>P2 $\beta$ | GTCCAGCCTATTGT<br>TTGAGA      |                                     | GTGCCGGTCCTCAT<br>AGATA       |
| RT-PCR           | ESR<br>P1         | AATCGAAATGGCTT<br>ATCCCC      |                                     | GGTTGCATACTGGT<br>AACCTT      |
| RT-PCR<br>/Q-MSP | ANK<br>RD1        | AGACAGAGAAGGA<br>GATACCC      | AGACTGAACCGCTATA<br>AGATGATCCGA     | CACCTATAACCCTG<br>TGCTTT      |
| RT-PCR           | AXL               | CACTTACAAGACTT<br>GGTCCC      |                                     | GGGAGCACTGTGAT<br>GGT         |
| RT-PCR           | CAV<br>1          | GTTCGAAGAGGTG<br>GAGTG        |                                     | TGTAGAGATGTCCC<br>TGCG        |
| RT-PCR<br>/Q-MSP | ETS1              | TTTTGGGAAGAAAG<br>TCGGAT      | AGCTCCAGATCGACTT<br>TTTCCGTCTTG     | CTGCACATTCCATA<br>TCCGGG      |
| RT-PCR<br>/Q-MSP | IFI16             | TCCTTACTGAGCAA<br>CGATTT      | CTCTGCTCCTTCAGTT<br>TTGACAGTGC      | CTGTTTTCGGGTTC<br>TGAGC       |
| RT-PCR<br>/Q-MSP | KIAA<br>1199      | GCATTTTCTTGGTA<br>GCACAA      | ATATATCTTTGTTTCATG<br>GTGATGCCTACAA | CGAGCAGTGAAGTTC<br>TTGA       |
| RT-PCR           | PTR<br>F          | CATGATCTACCAGG<br>ATGAAGT     | CTTCTCCAGGTTCTCG<br>CGGGTAC         | TTTTCTTGGTCTT<br>GAGGC        |
| Q-MSP            | RAB<br>25         | TGGGGAATGGAAC<br>TGAGGAAGA    | TCGCCGATCAGCACCA<br>CCTTGAAGACA     | CGTGAATCGGGAG<br>AGTAGATTGG   |
| Q-MSP            | ESR               | GGAGTTCGCCACA                 | TTTGAATCACCAGGGC                    | CAGACTTCATCTGG                |

|        |      |                |                  |                |
|--------|------|----------------|------------------|----------------|
|        | P1   | GATATTCGTA     | CGCCCATCAG       | ATAAAGGCATC    |
| RT-PCR | ZEB1 | AACAGTTGGTTTGG | ATCAAGCCAATATTGC | CTTCACCCATACAA |
| /Q-MSP |      | TGT            | ATCC             | CAAGGT         |

\*1 : RT-PCR was done at 95° C for 3 min followed by 30 cycles at 95° C for 1 min, 60° C for 1 min, 72° C for 1 min, and final extension at 72° C for 10 min.

1 μl dNTP mixture, 1.5 μl MgCl<sub>2</sub>, 0.2 μmol/l each primer and 0.2 μl Platinum Taq DNA polymerase.

\*2 : Bisulfite Sequencing PCR was done based protocol of EZ DNA Methylation-Gold Kit (QIAGEN).

\*3 : Q-MSP was done at 95° C for 3 min followed by 40 cycles at 95° C for 20 sec, 60° C for 30 sec, and 72° C for 30 sec, in a 25 μl reaction volume containing 200nmol/l fluorescein probe, and 25 μl iQTM supermix.

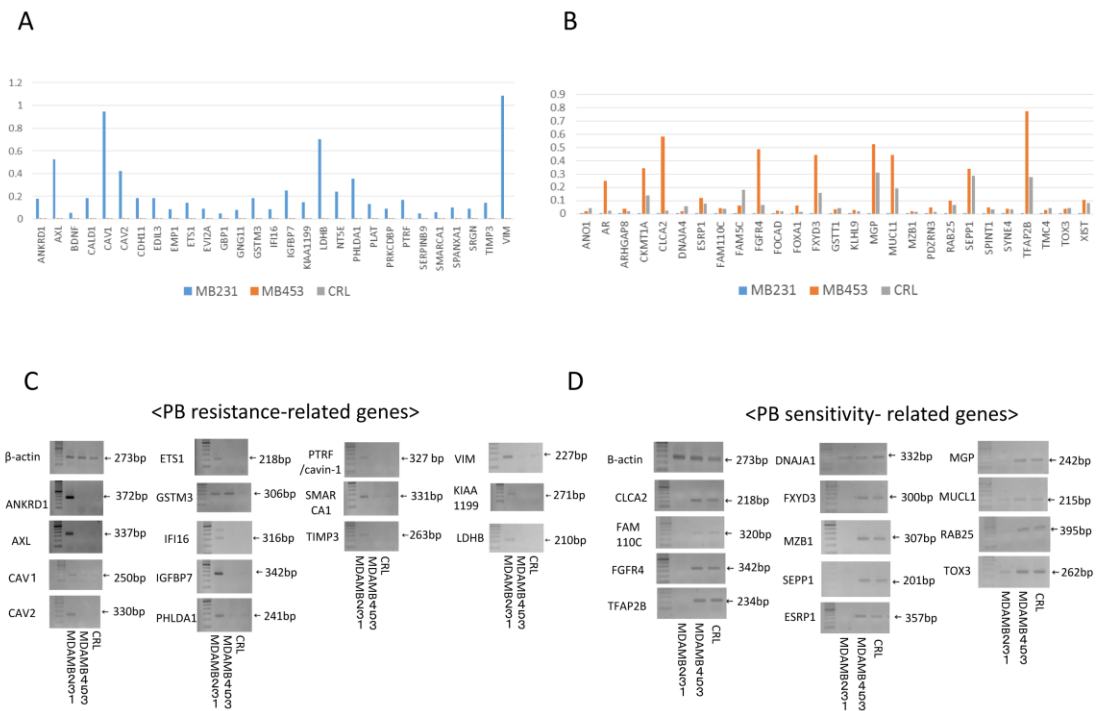

**Figure S1. PB resistance-related genes and sensitivity-related genes identified using microarrays.**

(A) PB resistance-related genes (those highly expressed in PB-resistant strains and minimally expressed in PB-sensitive strains) identified using microarrays.

(B) PB sensitivity-related genes (those highly expressed in PB-sensitive strains and minimally expressed in PB-resistant strains) identified using microarrays.

(C) mRNA expression levels of PB resistance-related genes in MDAMB453, CRL, and MDAMB231 cells as measured by semi-quantitative RT-PCR.

(D) mRNA expression levels of PB sensitivity-related genes in MDAMB453, CRL, and MDAMB231 cells as measured by semi-quantitative RT-PCR.
